# Supplementary material for: Novel benzimidazole–oxadiazole hybrid molecules as promising antimicrobial agents
Source: Royal Society of Chemistry journal article supplement (doi:10.1039/c5ra23282a), 2016-01-01
Supplement: c5ra23282a1.pdf [file c5ra23282a1.pdf]

## **Novel benzimidazole-oxadiazole hybrid molecules as promising antimicrobial agents**

Shruthi N<sup>a</sup>, Boja Poojary<sup>a\*</sup>, Vasantha Kumar <sup>a</sup>, Mohammed Mumtaz Hussain<sup>b</sup>, Vaishali Rai M<sup>c</sup>,  
Vinitha R Pai<sup>c</sup>, Mahima Bhat<sup>a</sup>, B. C. Revanasiddappa<sup>d</sup>

All solvents used were of analytical grade and chemicals were purchased from commercial vendors Sigma-Aldrich, Spectrochem India and used as such without purification. Melting points were determined in open capillaries and uncorrected (melting point apparatus: Sewell instruments Inc., India). The purity of the compounds was checked by thin layer chromatography on a silica coated aluminum sheet (silica gel F<sub>254</sub>). IR spectra (ATR) were recorded on a Shimadzu FT IR 157-spectrophotometer. The <sup>1</sup>H NMR spectra were recorded on a Bruker Avance II 400 (400 MHz) spectrometer using TMS as internal standard. The <sup>13</sup>C NMR was recorded in 400 MHz Joel resonance-delta 2-NMR refractometer. Mass spectra were determined on a Joel SX 102/Da-600 mass spectrometer/data system using argon/xenon (6 kV, 10 mA) as the FAB gas. Elemental analyses were carried out using a CHNS elemental analyzer.

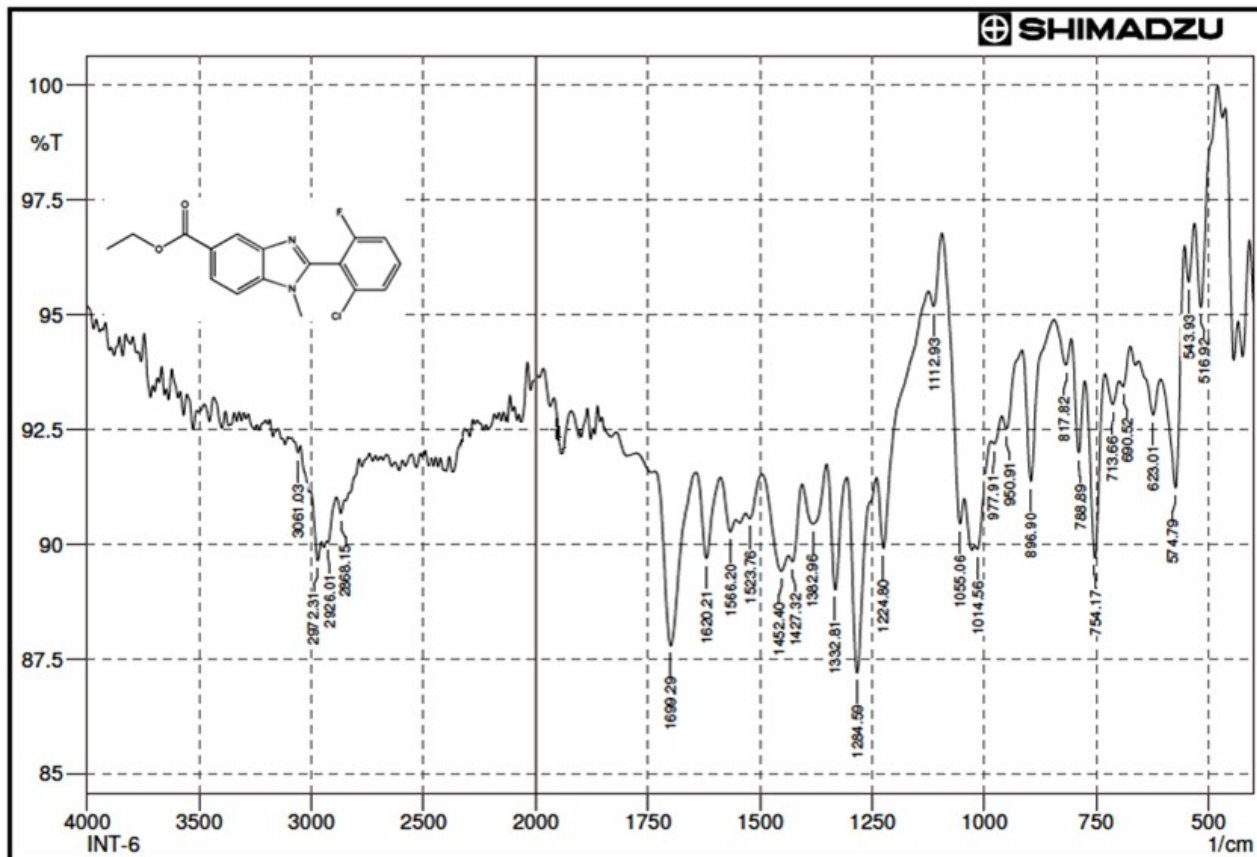

FT(ATR)-IR spectrum Ethyl 2-(2-chloro-6-fluorophenyl)-1-methyl-1H-benzo[d]imidazole-5-carboxylate

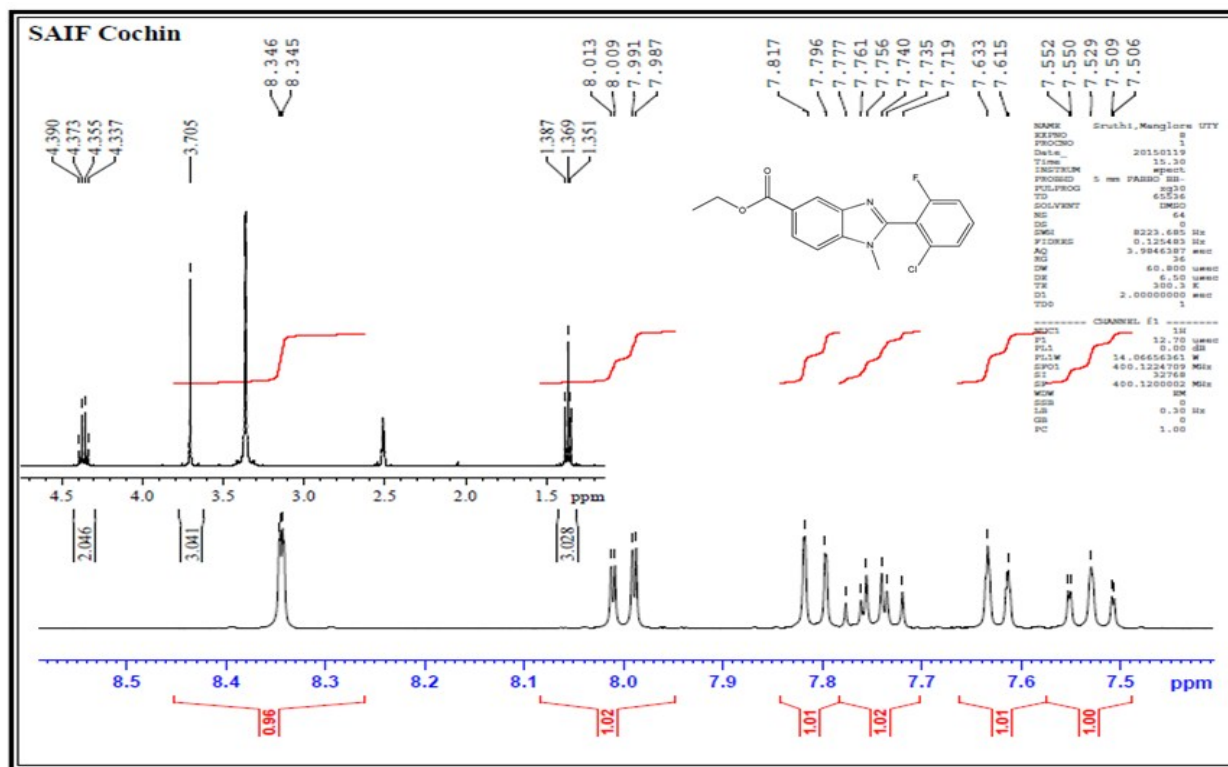

**<sup>1</sup>H NMR spectrum of Ethyl 2-(2-chloro-6-fluorophenyl)-1-methyl-1H-benzo[d]imidazole-5-carboxylate**

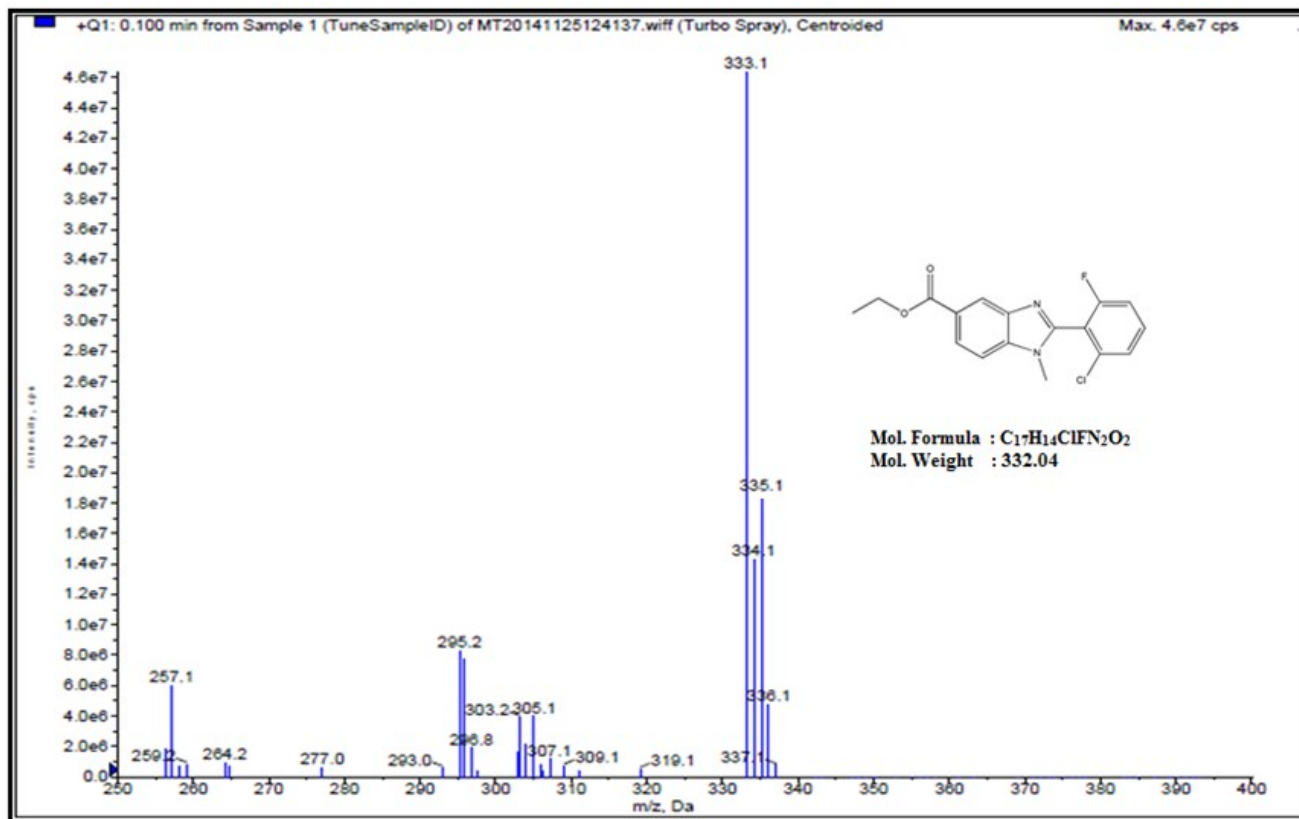

ESI-MS spectrum of Ethyl 2-(2-chloro-6-fluorophenyl)-1-methyl-1H-benzo[d]imidazole-5-carboxylate

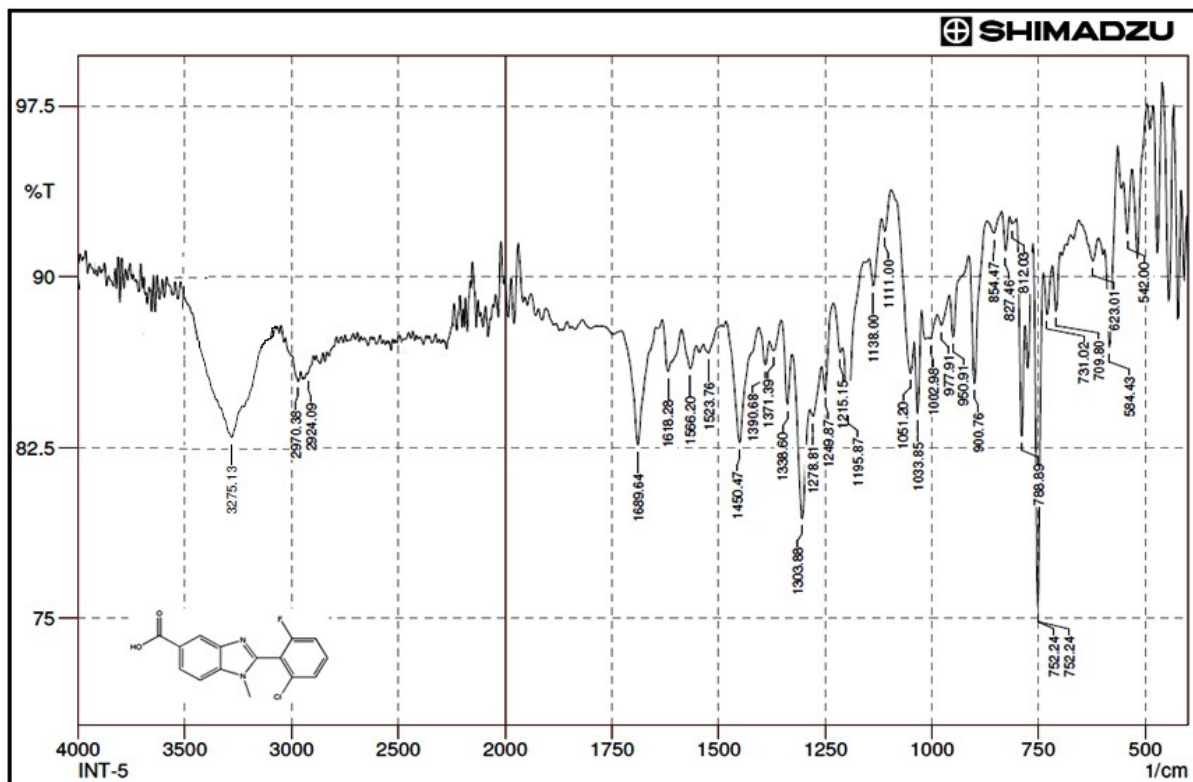

FT(ATR)-IR spectrum 2-(2-Chloro-6-fluorophenyl)-1-methyl-1H-benzo[d]imidazole-5-carboxylic acid

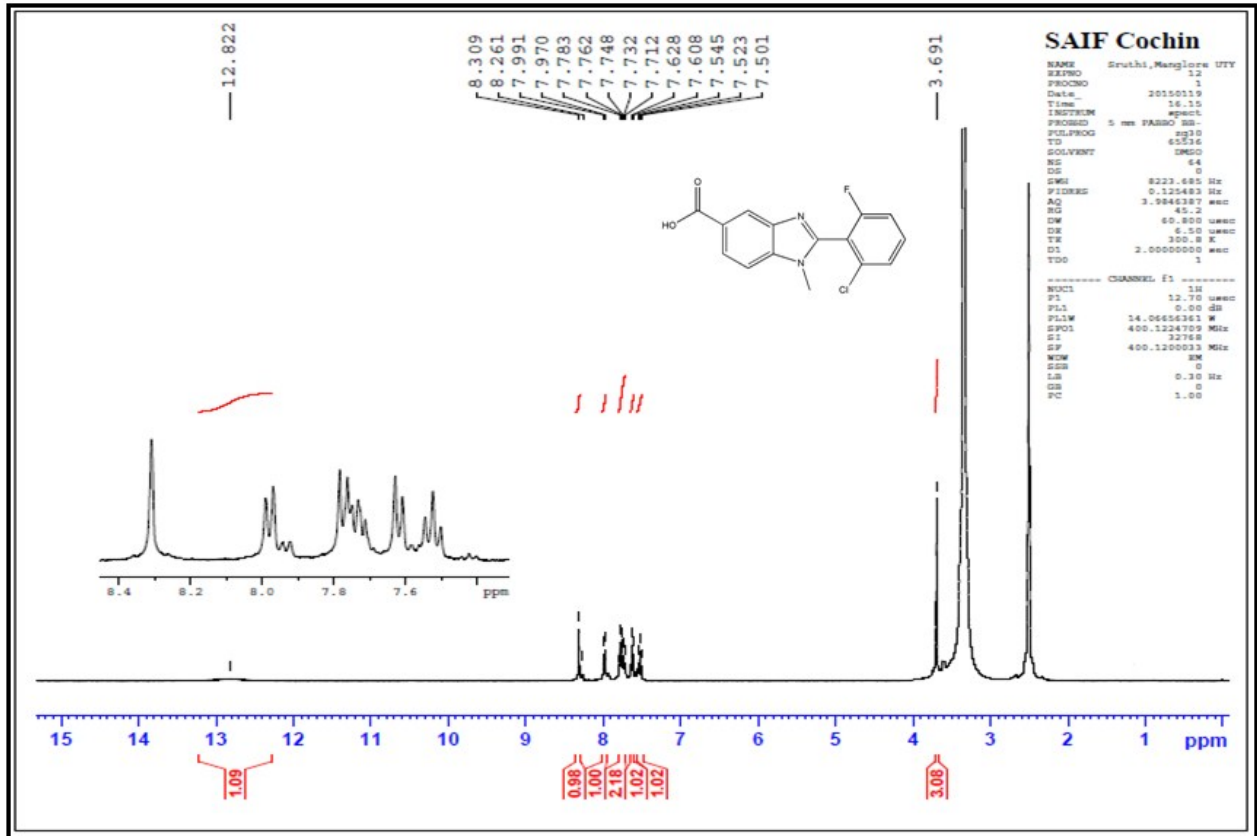

**<sup>1</sup>H NMR spectrum of 2-(2-Chloro-6-fluorophenyl)-1-methyl-1H-benzo[d]imidazole-5-carboxylic acid**

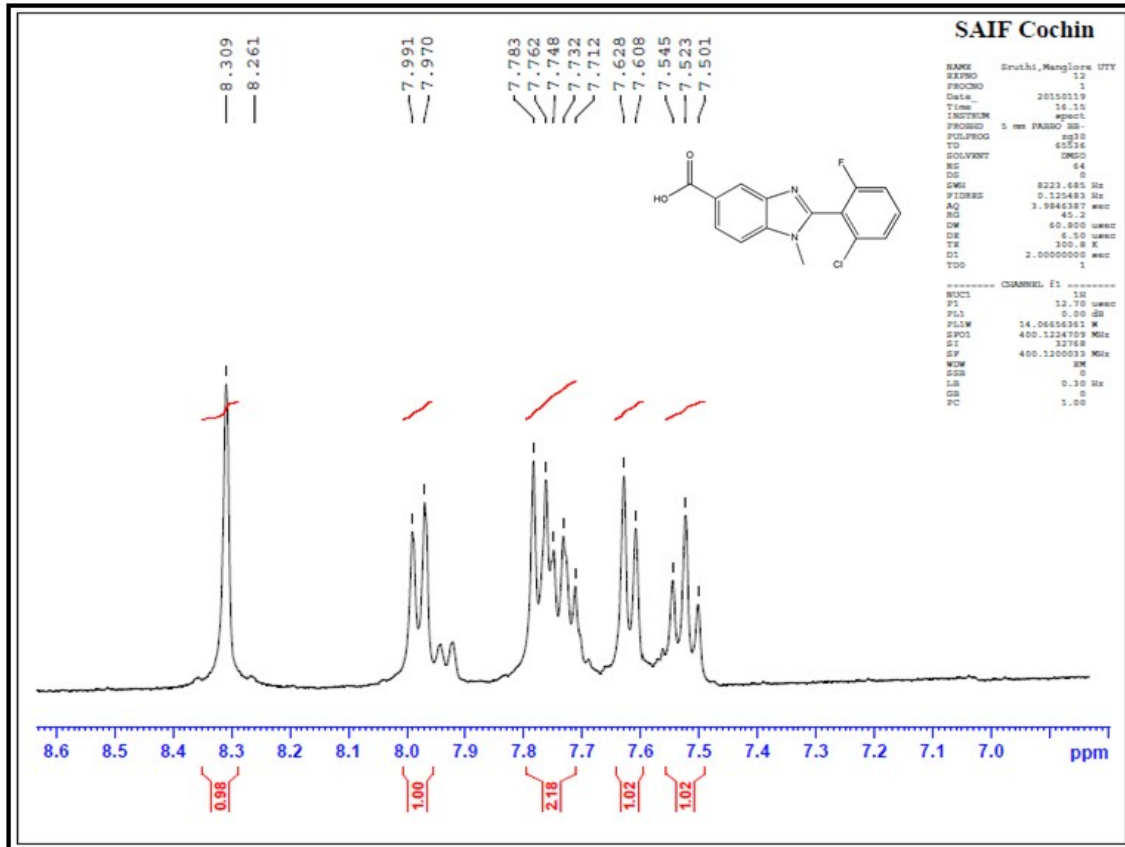

**Expanded <sup>1</sup>H NMR spectrum of 2-(2-Chloro-6-fluorophenyl)-1-methyl-1H-benzo[d]imidazole-5-carboxylic acid**

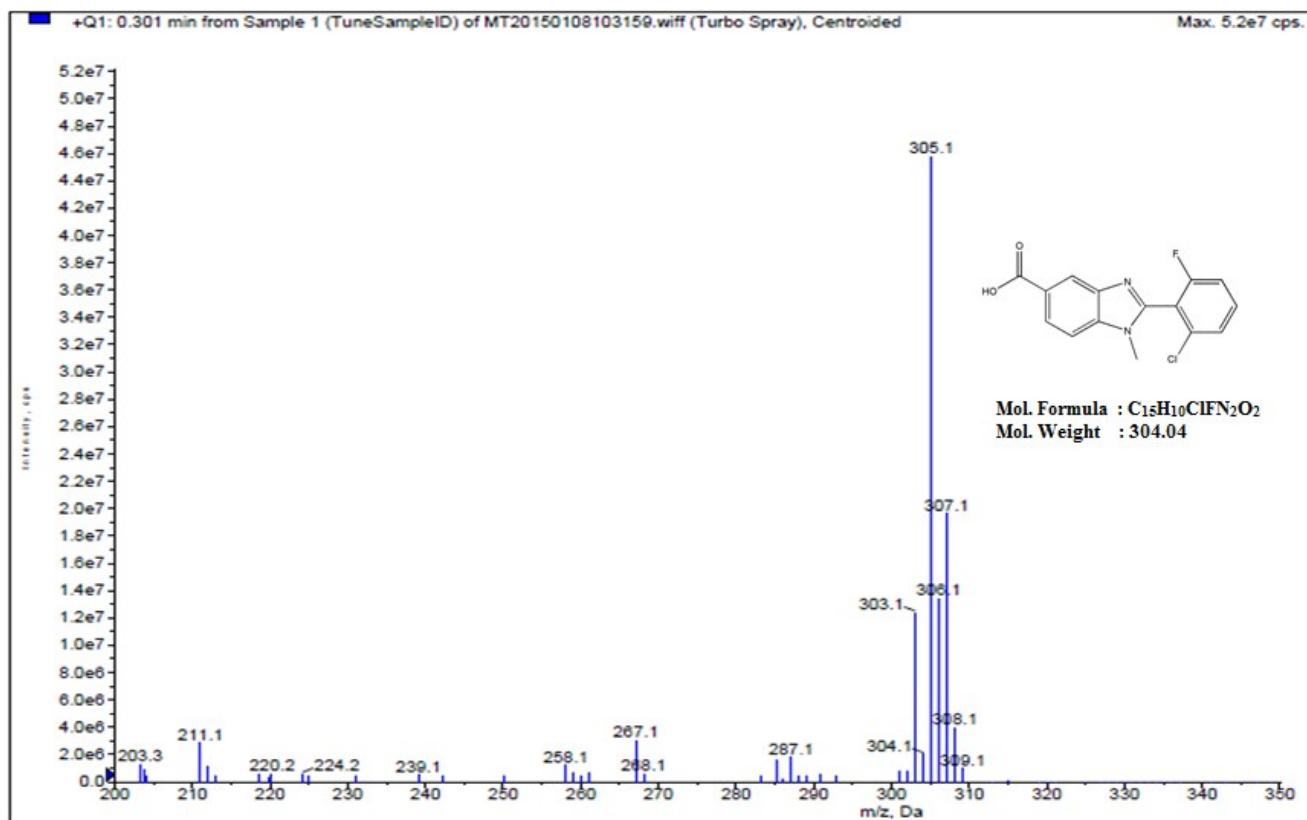

Mass spectrum of 2-(2-Chloro-6-fluorophenyl)-1-methyl-1H-benzo[d]imidazole-5-carboxylic acid



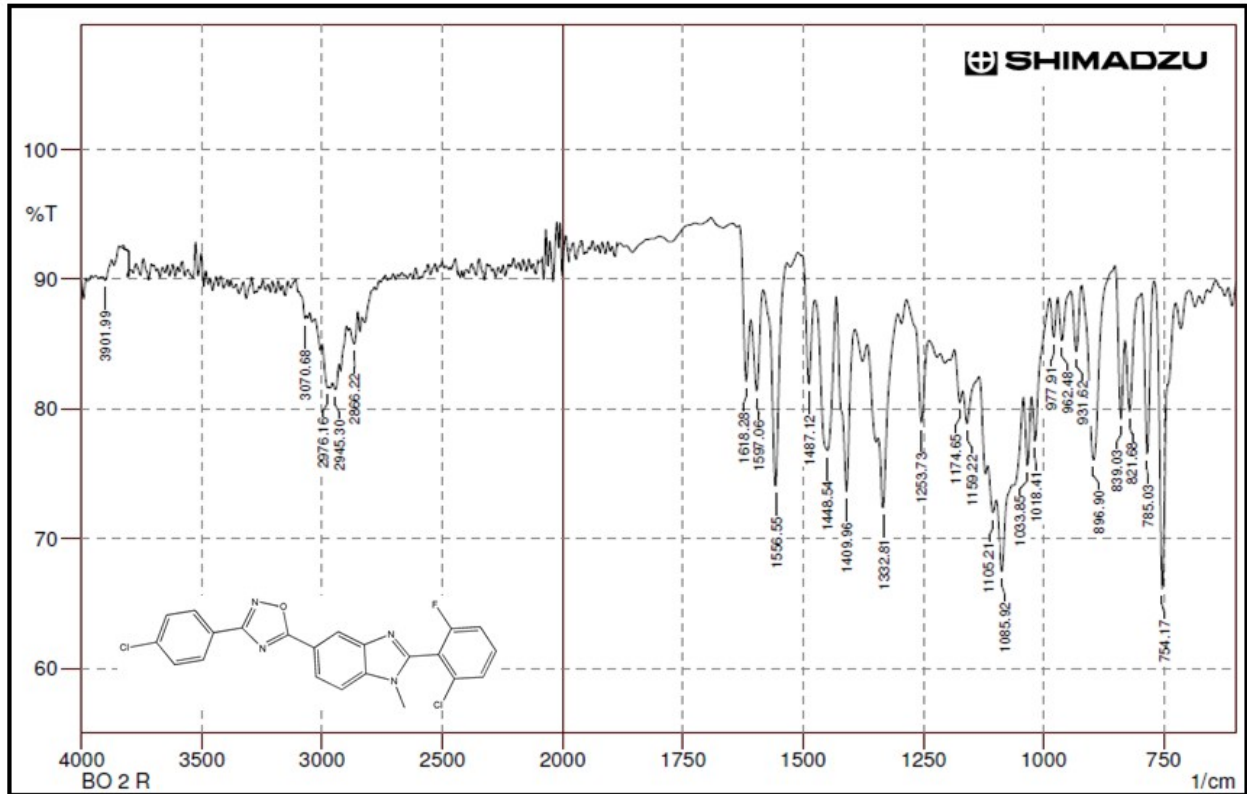

**FT(ATR)-IR spectrum of 2-(2-Chloro-6-fluorophenyl)-5-(3-(4-chlorophenyl)-[1,2,4]-oxadiazol-5-yl)-1-methyl-1H-benzo[d]imidazole**

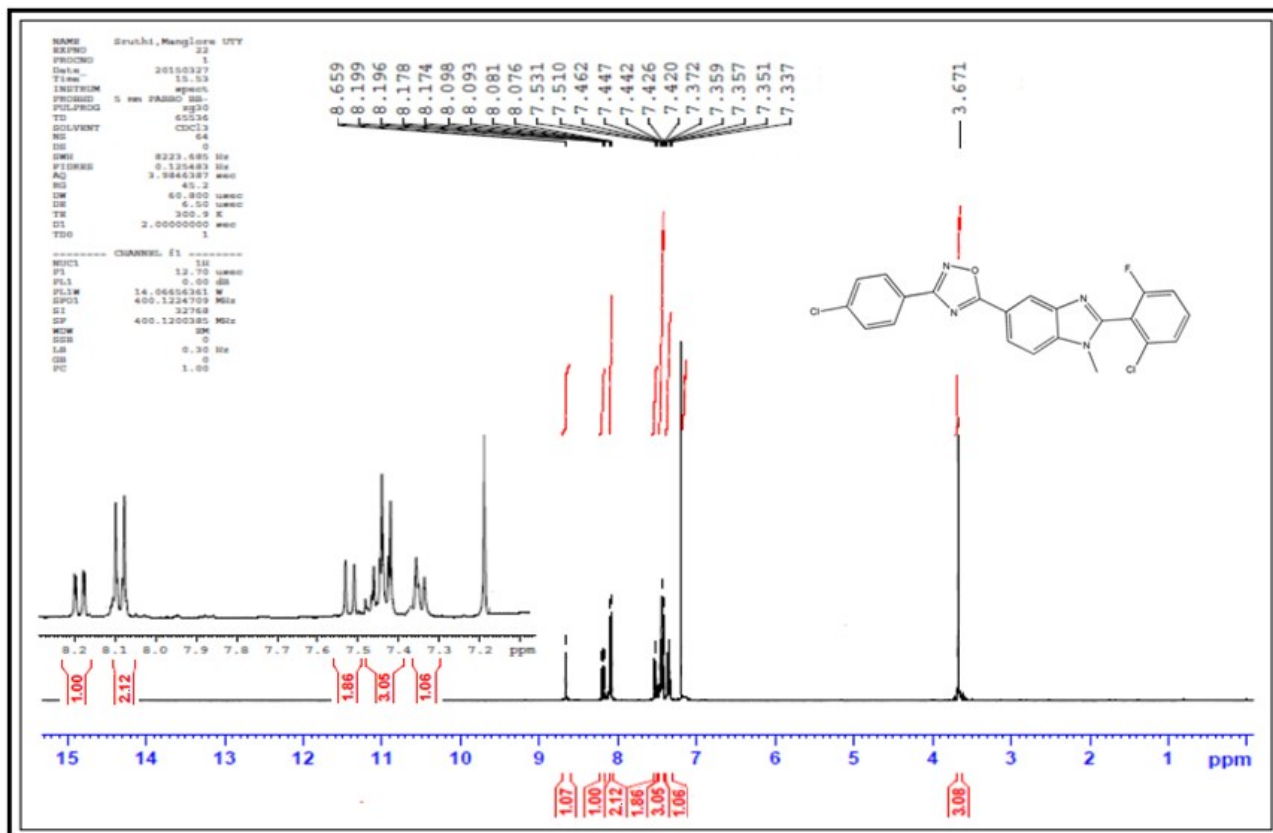

**<sup>1</sup>H-NMR spectrum of 2-(2-Chloro-6-fluorophenyl)-5-(3-(4-chlorophenyl)-[1,2,4]-oxadiazol-5-yl)-1-methyl-1H-benzo[d]imidazole**

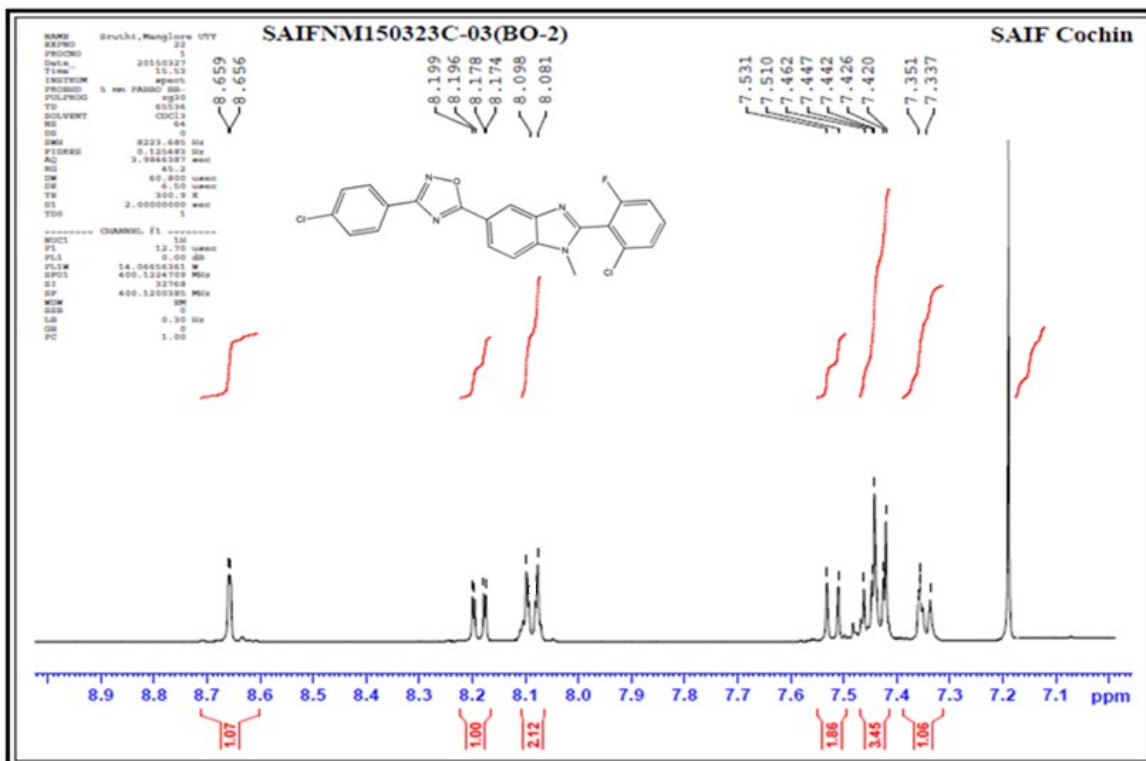

Expanded  $^1\text{H-NMR}$  spectrum of 2-(2-Chloro-6-fluorophenyl)-5-(3-(4-chlorophenyl)-[1,2,4]-oxadiazol-5-yl)-1-methyl-1*H*-benzo[*d*]imidazole

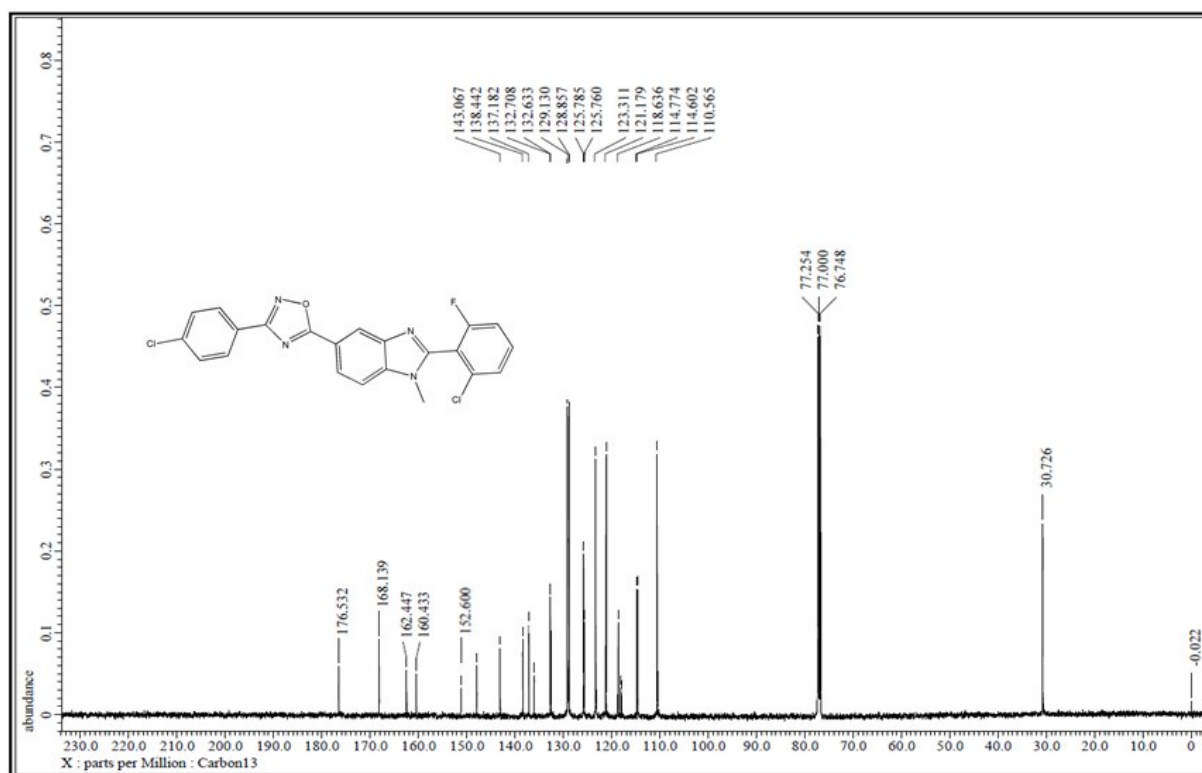

**<sup>13</sup>C NMR spectrum of 2-(2-Chloro-6-fluorophenyl)-5-(3-(4-chlorophenyl)-[1,2,4]-oxadiazol-5-yl)-1-methyl-1H-benzo[d]imidazole**

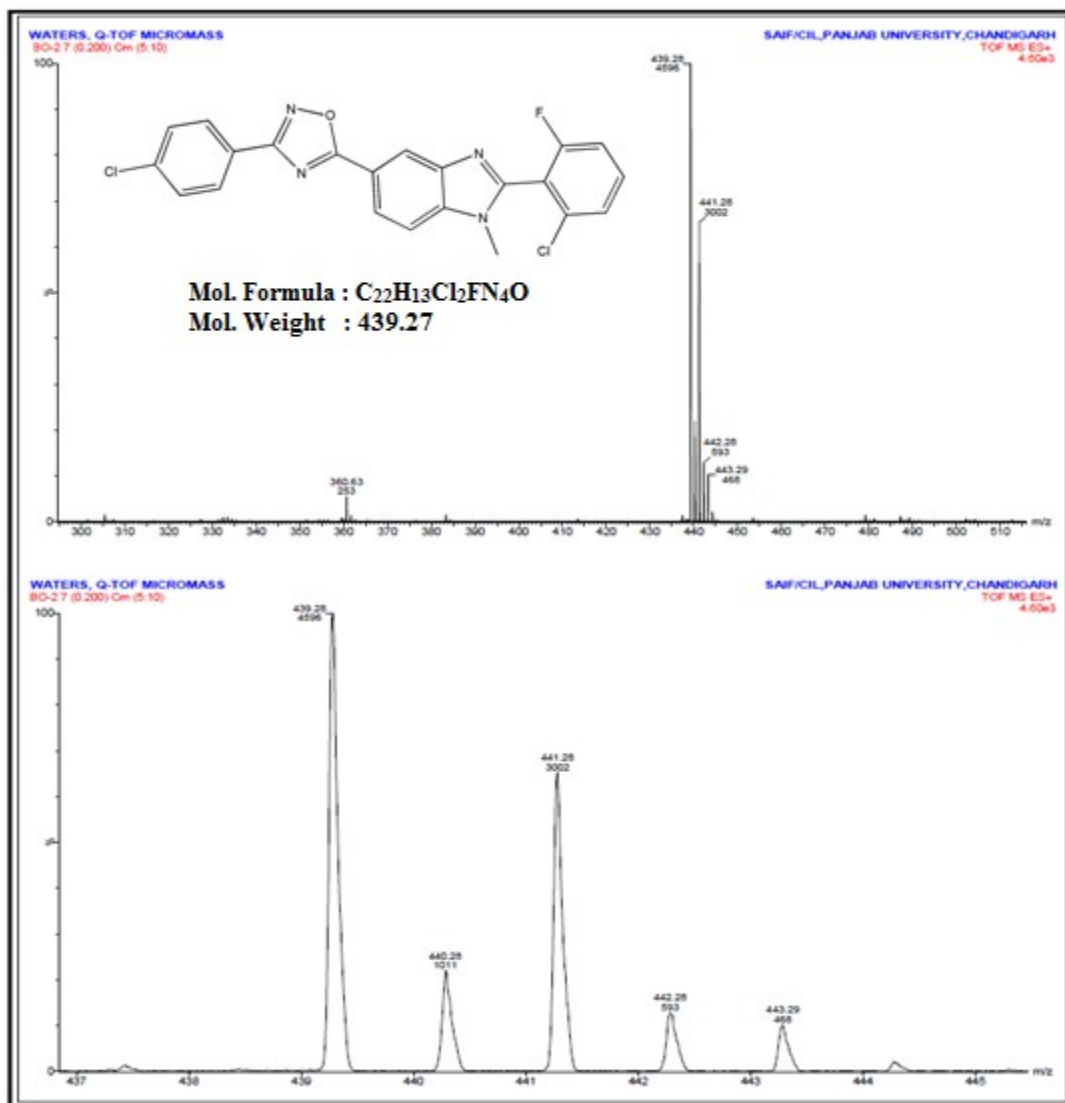

**Mass spectrum of 2-(2-Chloro-6-fluorophenyl)-5-(3-(4-chlorophenyl)-[1,2,4]-oxadiazol-5-yl)-1-methyl-1H-benzo[d]imidazole**

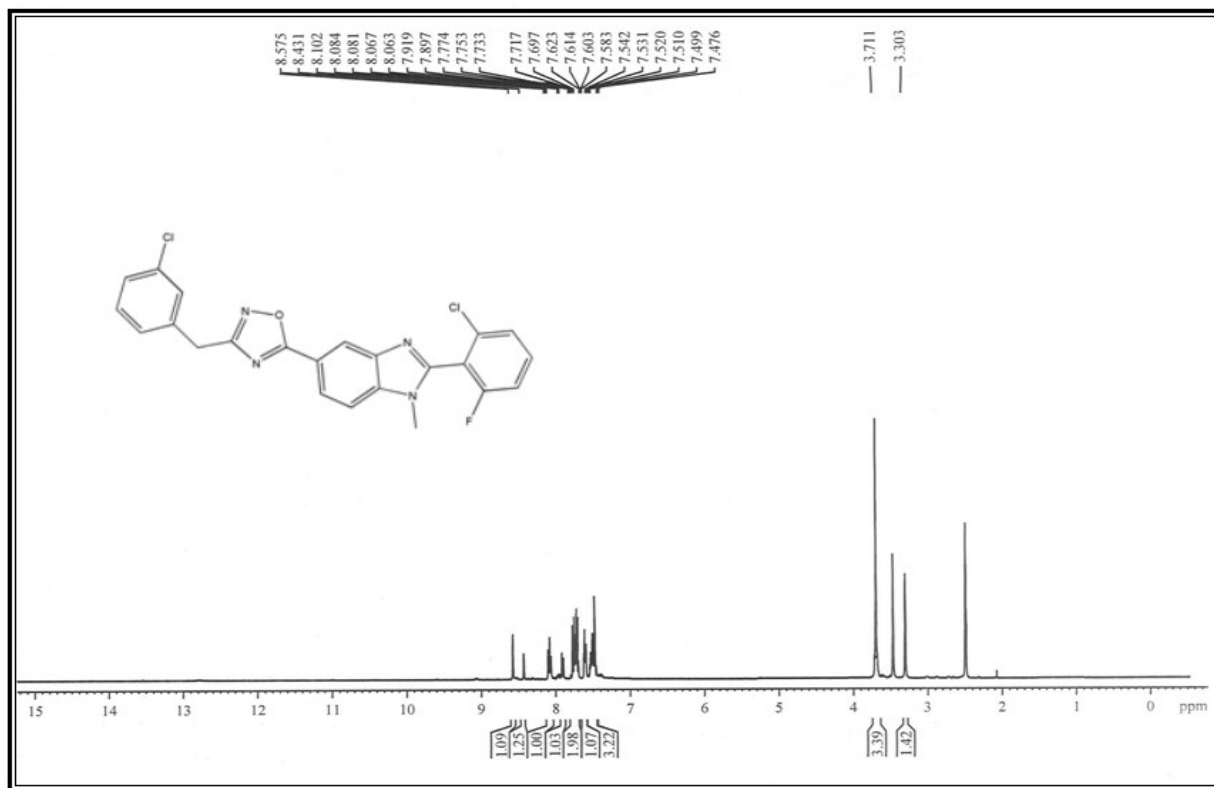

**<sup>1</sup>H NMR spectrum of 2-(2-Chloro-6-fluorophenyl)-5-(3-(3-chlorobenzyl)-[1,2,4]-oxadiazol-5-yl)-1-methyl-1H-benzo[d]imidazole**

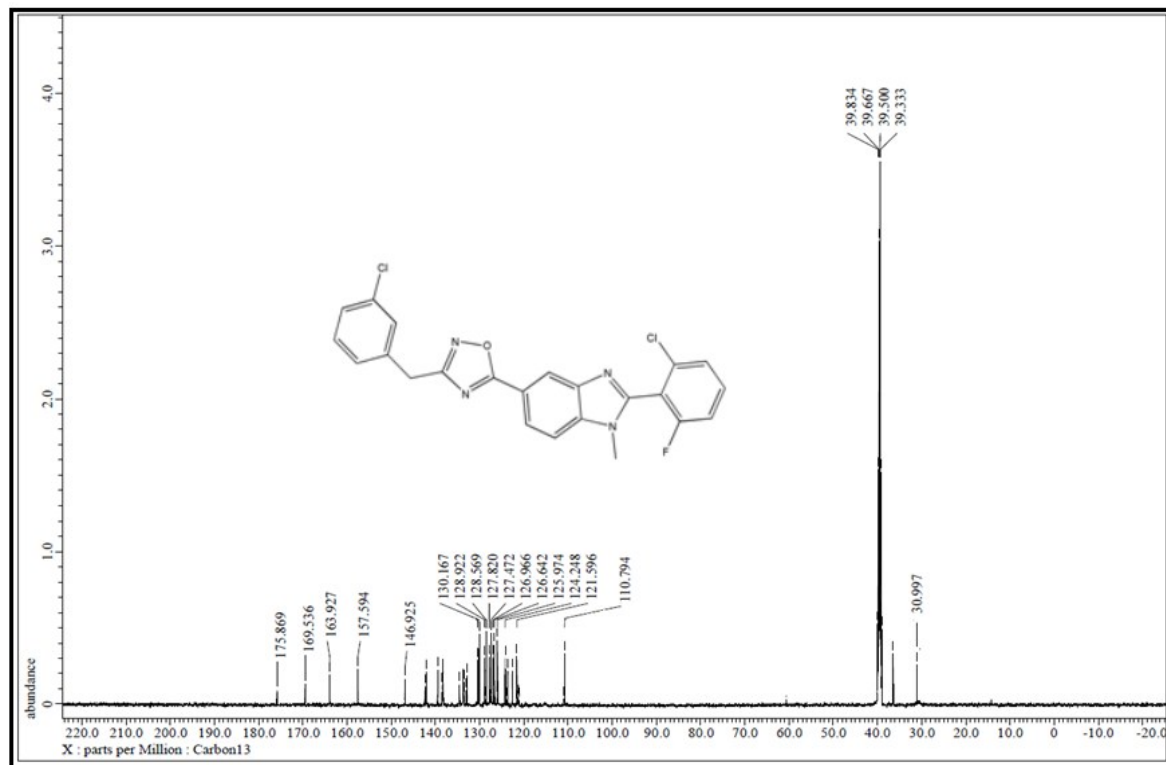

**<sup>13</sup>C NMR spectrum of 2-(2-Chloro-6-fluorophenyl)-5-(3-(3-chlorobenzyl)-[1,2,4]-oxadiazol-5-yl)-1-methyl-1H-benzo[d]imidazole**

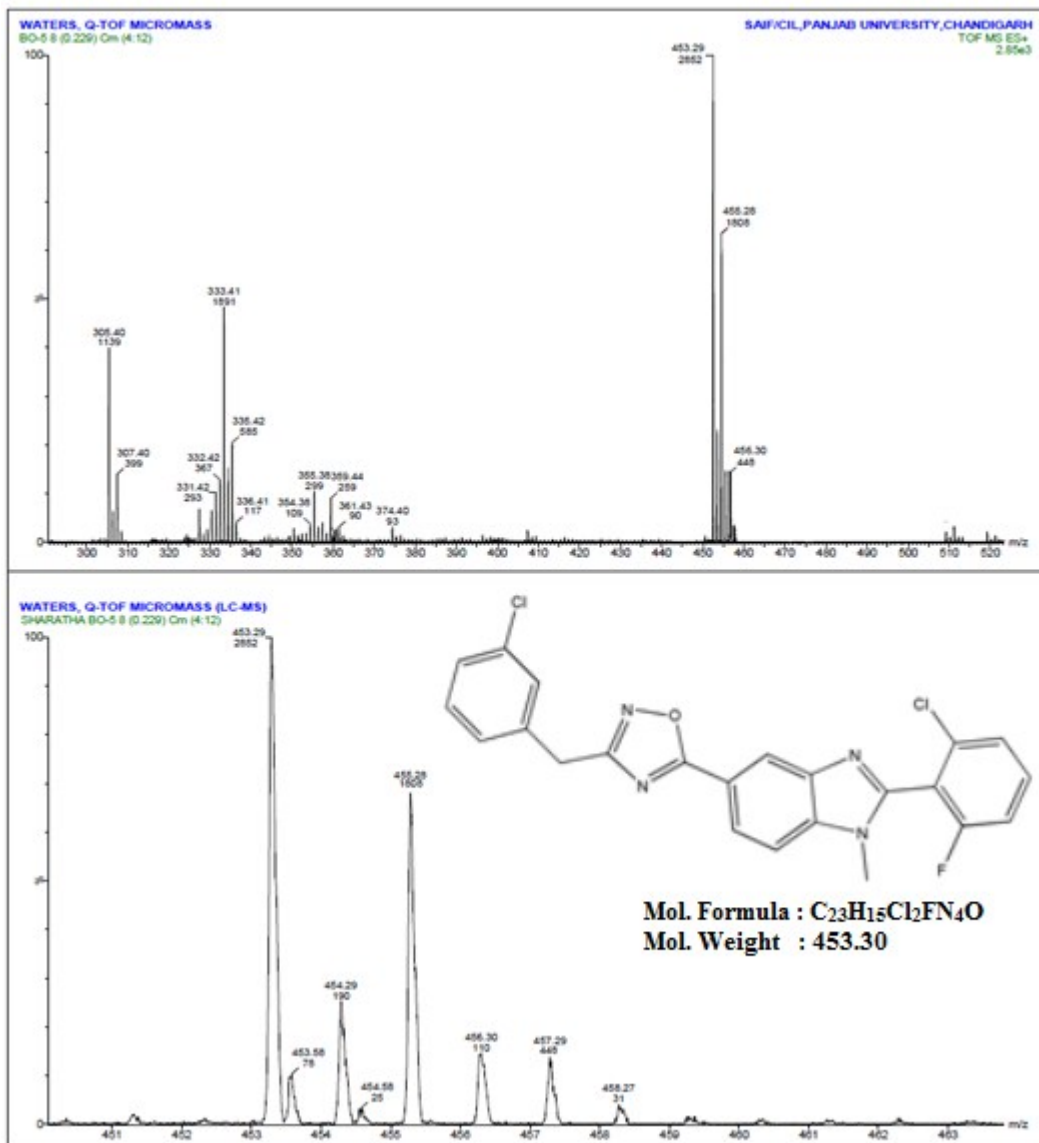

Mass spectrum of 2-(2-Chloro-6-fluorophenyl)-5-(3-(3-chlorobenzyl)-[1,2,4]-oxadiazol-5-yl)-1-methyl-1H-benzo[d]imidazole

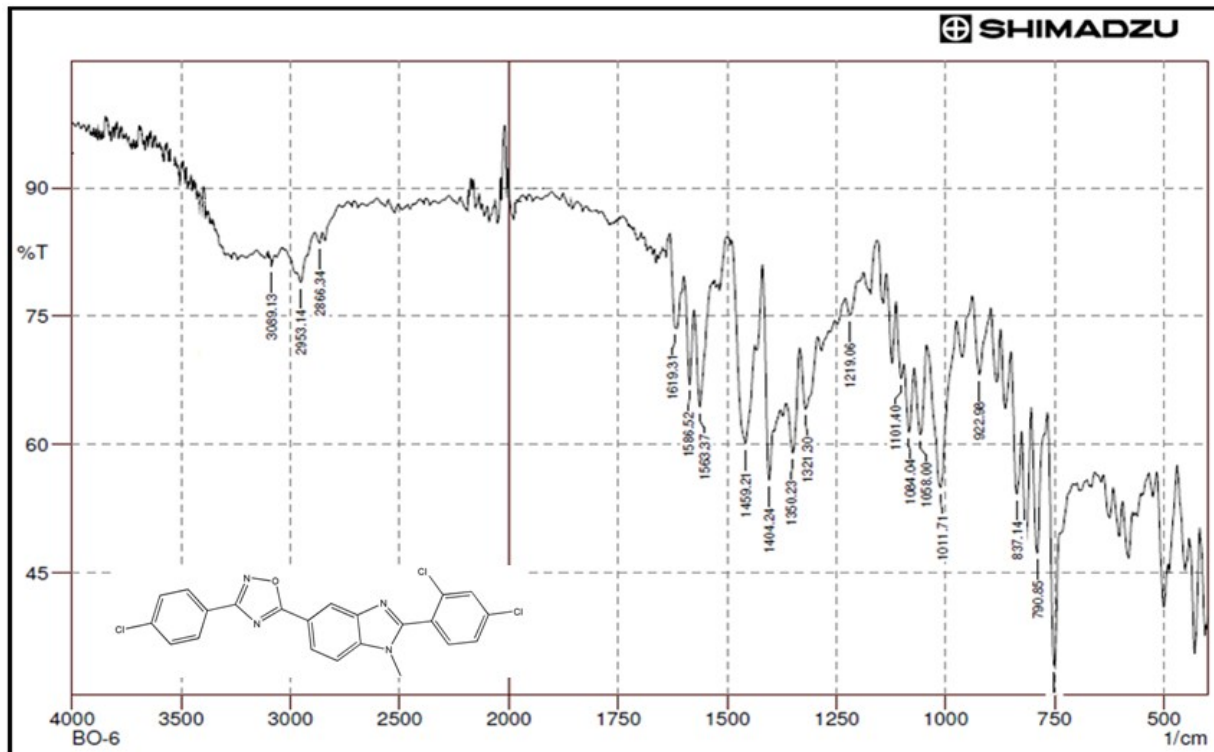

IR spectrum of 2-(2,4-dichlorophenyl)-5-(3-(4-chlorophenyl)-[1,2,4]-oxadiazol-5-yl)-1-methyl-1H-benzo[d]imidazole



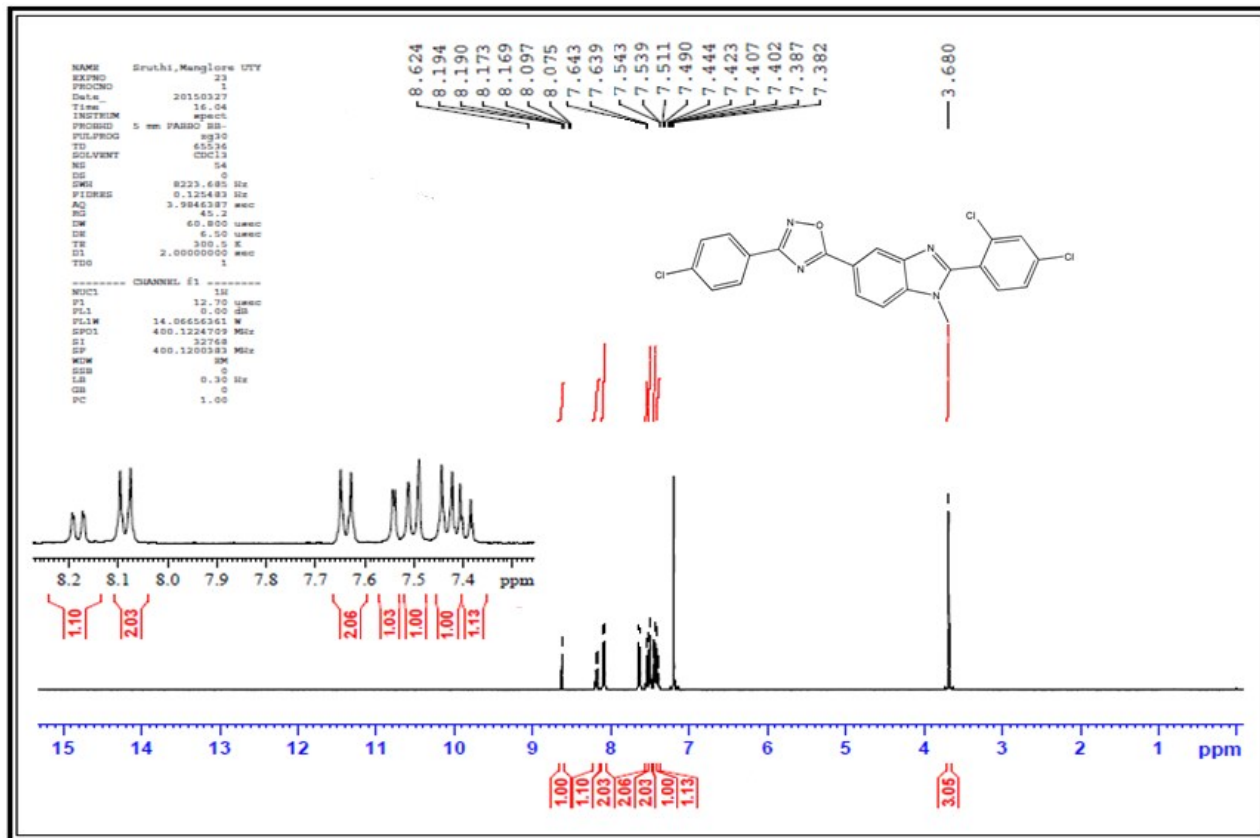

**<sup>1</sup>H-NMR spectrum of 2-(2,4-Dichlorophenyl)-5-(3-(4-chlorophenyl)-[1,2,4]-oxadiazol-5-yl)-1-methyl-1H-benzo[d]imidazole**

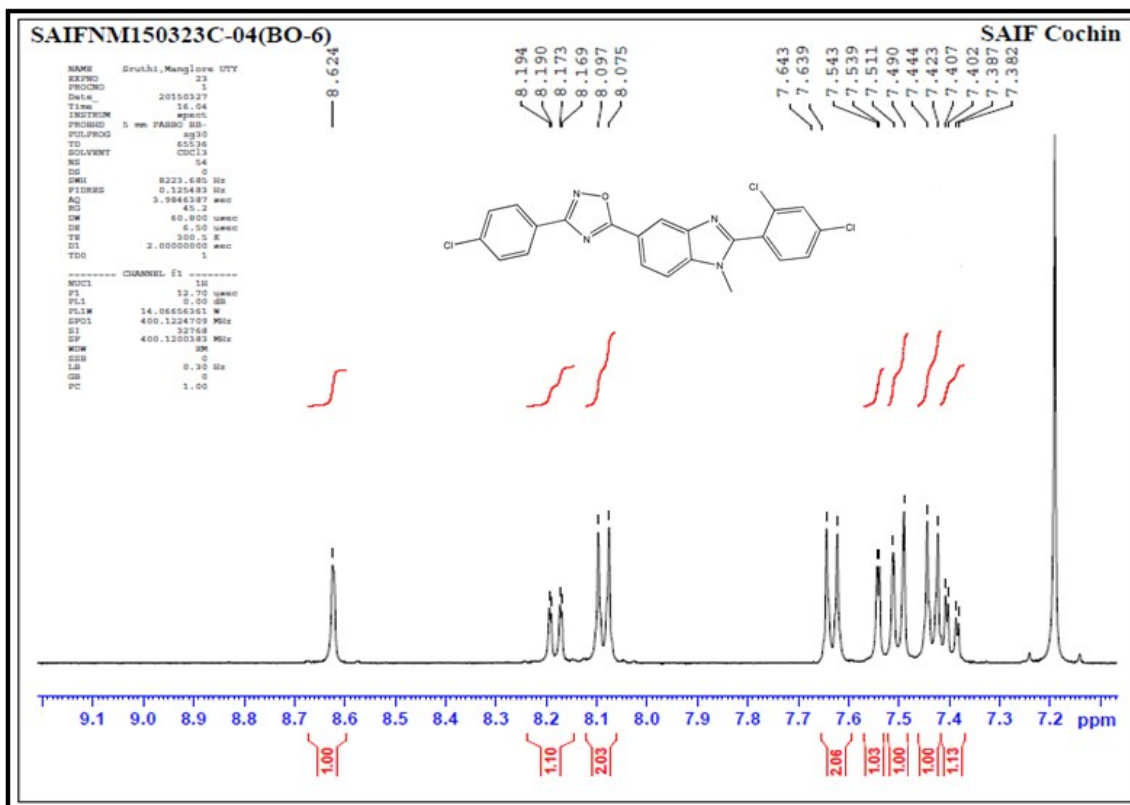

Expanded  $^1\text{H-NMR}$  spectrum of 2-(2,4-Dichlorophenyl)-5-(3-(4-chlorophenyl)-[1,2,4]-oxadiazol-5-yl)-1-methyl-1H-benzo[d]imidazole

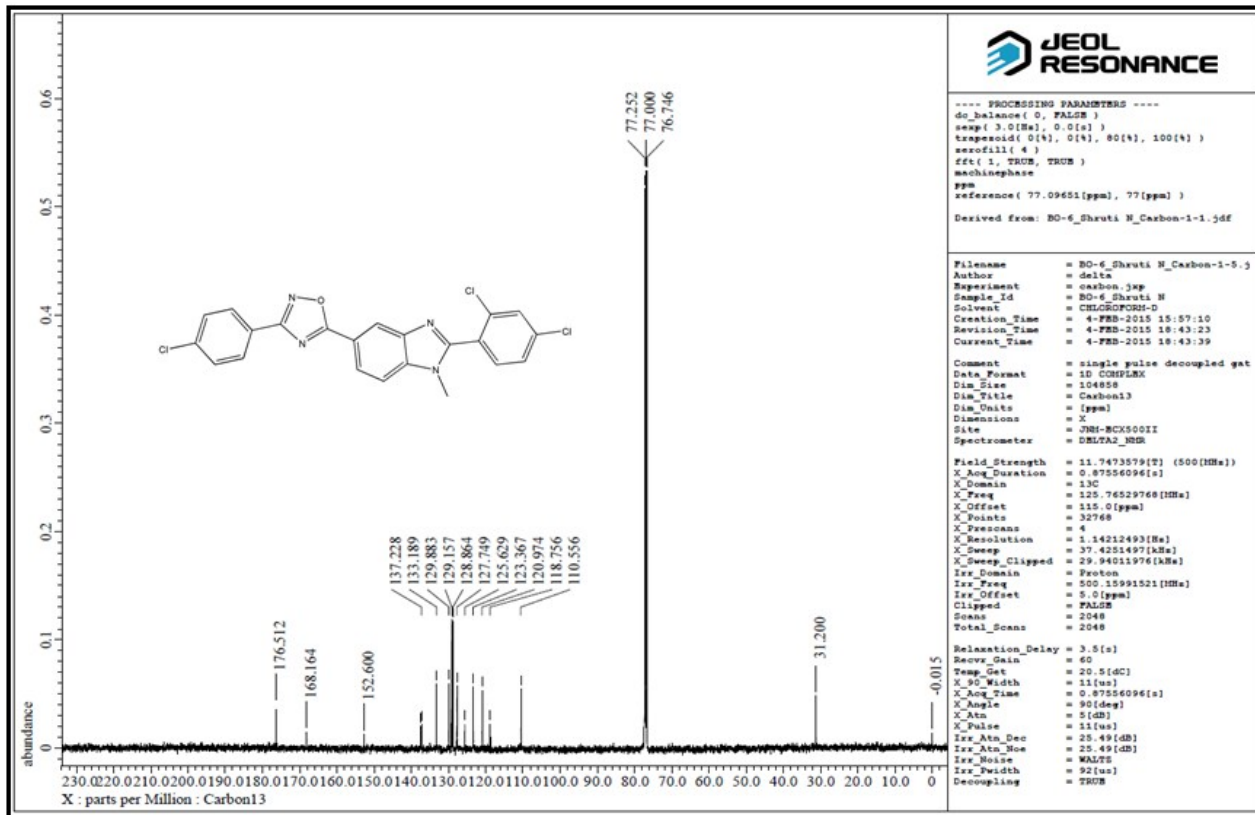

**<sup>13</sup>C NMR spectrum of 2-(2,4-Dichlorophenyl)-5-(3-(4-chlorophenyl)-[1,2,4]-oxadiazol-5-yl)-1-methyl-1H-benzo[d]imidazole**

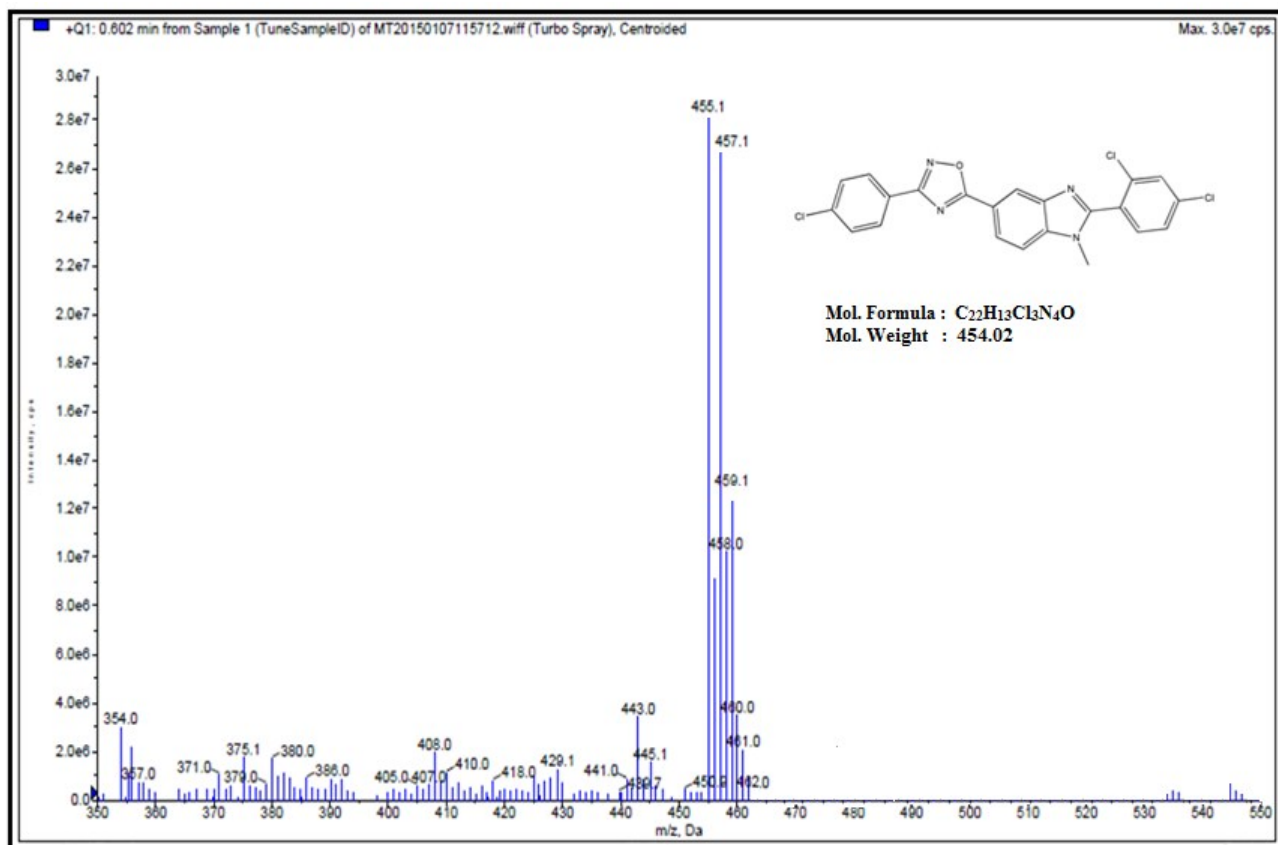

**Mass spectrum of 2-(2,4-Dichlorophenyl)-5-(3-(4-chlorophenyl)-[1,2,4]-oxadiazol-5-yl)-1-methyl-1H-benzo[d]imidazole**

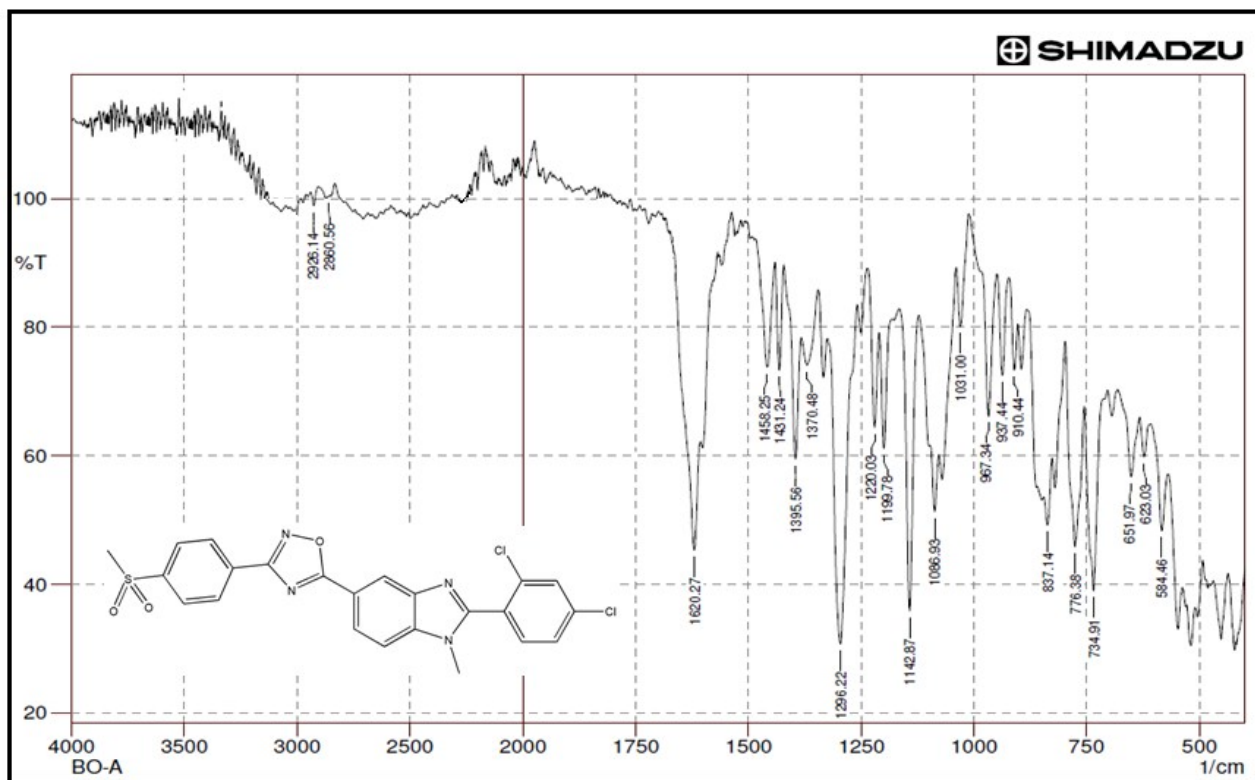

**FT(ATR)-IR spectrum of 2-(2,4-Dichlorophenyl)-5-(3-(4-(methylsulfonyl)phenyl)-[1,2,4]-oxadiazol-5-yl)- 1-methyl-1H-benzo[d]imidazole**

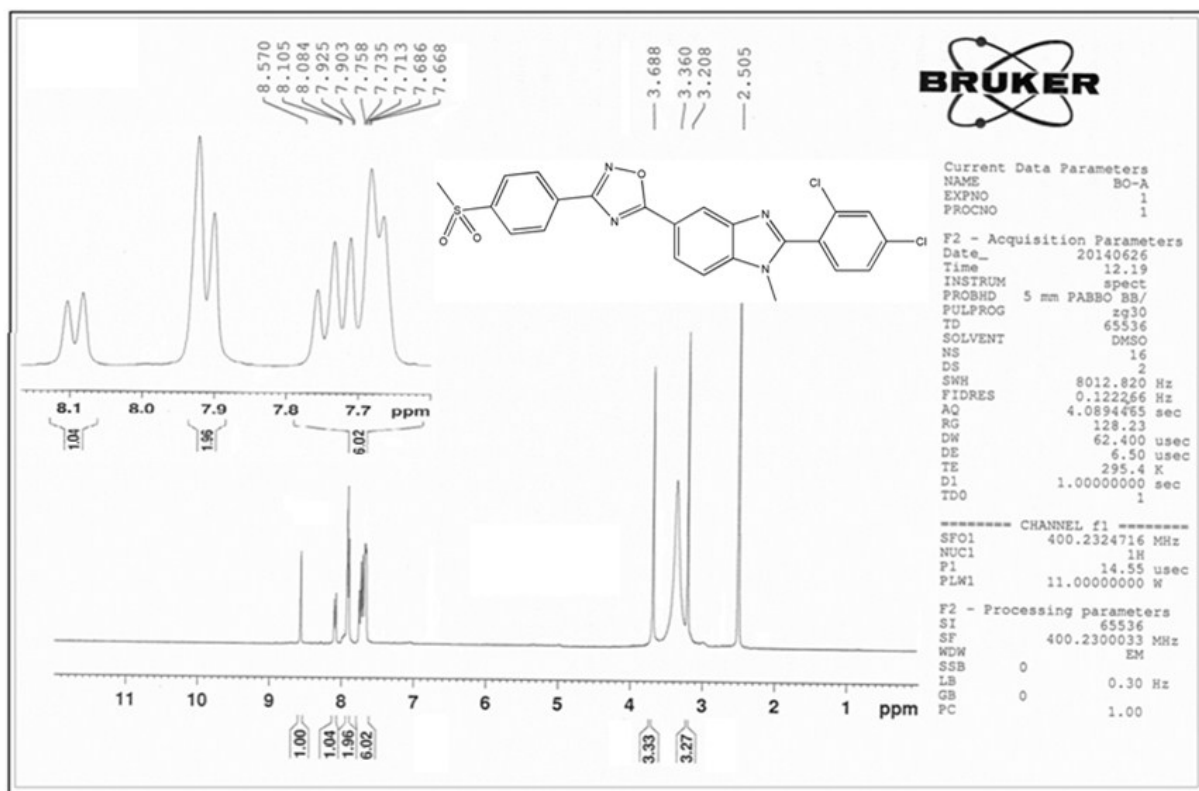

**<sup>1</sup>H-NMR spectrum of 2-(2,4-Dichlorophenyl)-5-(3-(4-(methylsulfonyl)phenyl)-[1,2,4]-oxadiazol-5-yl)-1-methyl-1H-benzo[d]imidazole**

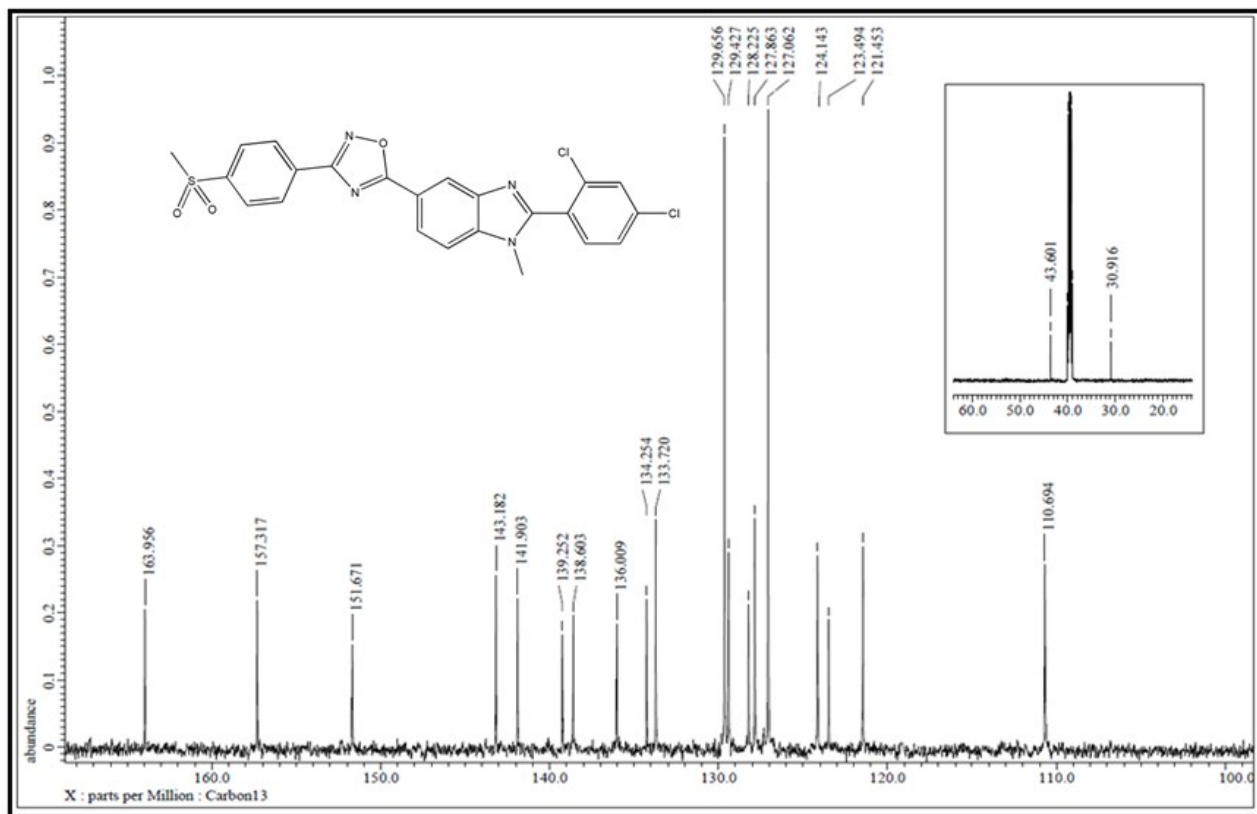

<sup>13</sup>C NMR spectrum of 2-(2,4-Dichlorophenyl)-5-(3-(4-(methylsulfonyl)phenyl)-[1,2,4]-oxadiazol-5-yl)-1-methyl-1H-benzo[d]imidazole

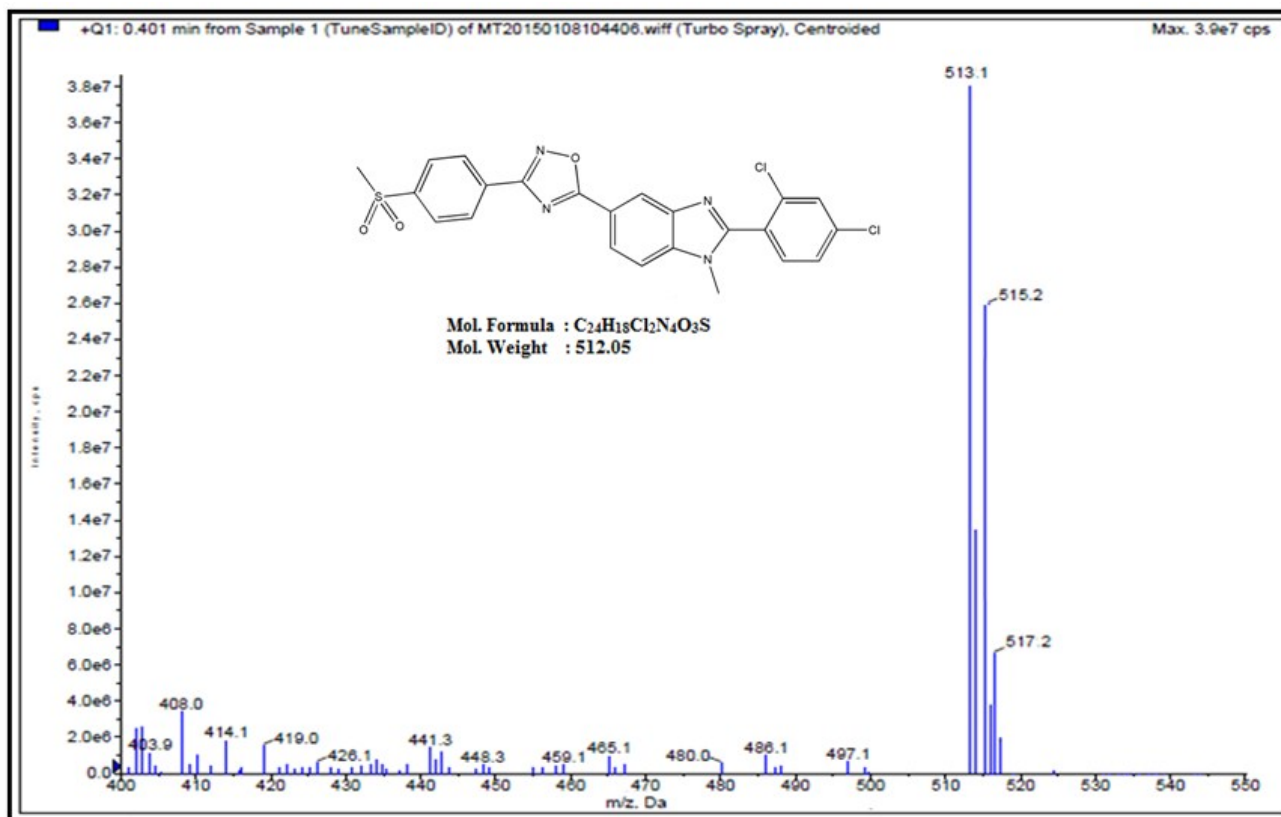

Mass spectrum of 2-(2,4-Dichlorophenyl)-5-(3-(4-(methylsulfonyl)phenyl)-[1,2,4]-oxadiazol-5-yl)-1-methyl-1H-benzo[d]imidazole



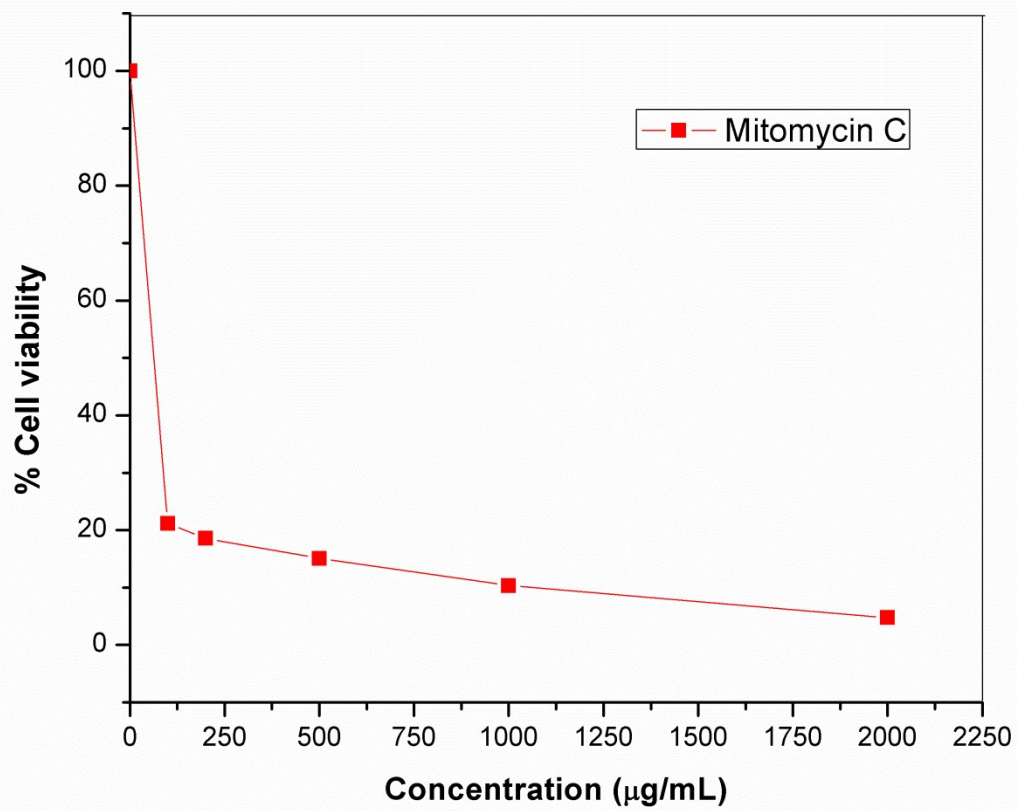

Percentage cell viability versus Concentration graph for standard drug Mitomycin C against kidney embryonic cell line HEK 293.
